# Supplementary figures and images for: Specific loss of adipocyte CD248 improves metabolic health via reduced white adipose tissue hypoxia, fibrosis and inflammation
Source: PubMed Central journal article supplement — eBioMedicine. 2019 Jun 17;44:489–501. doi: 10.1016/j.ebiom.2019.05.057 (PMC6606747; doi:10.1016/j.ebiom.2019.05.057), 2019-06-17

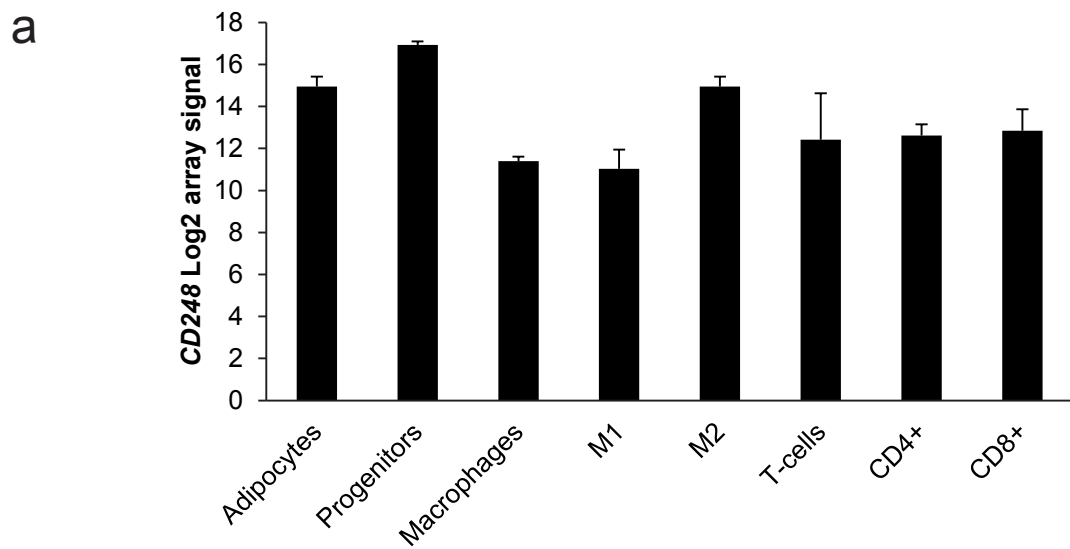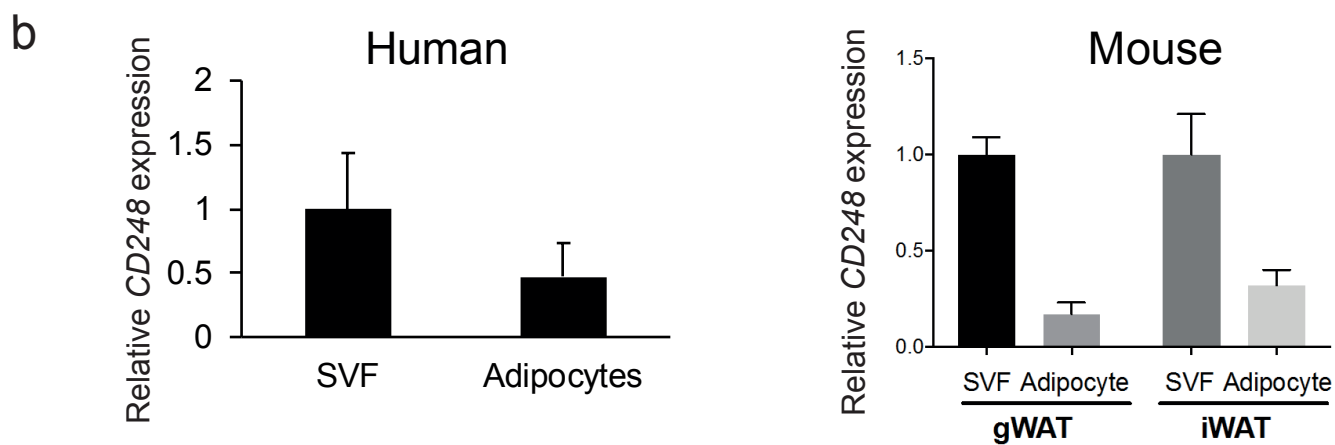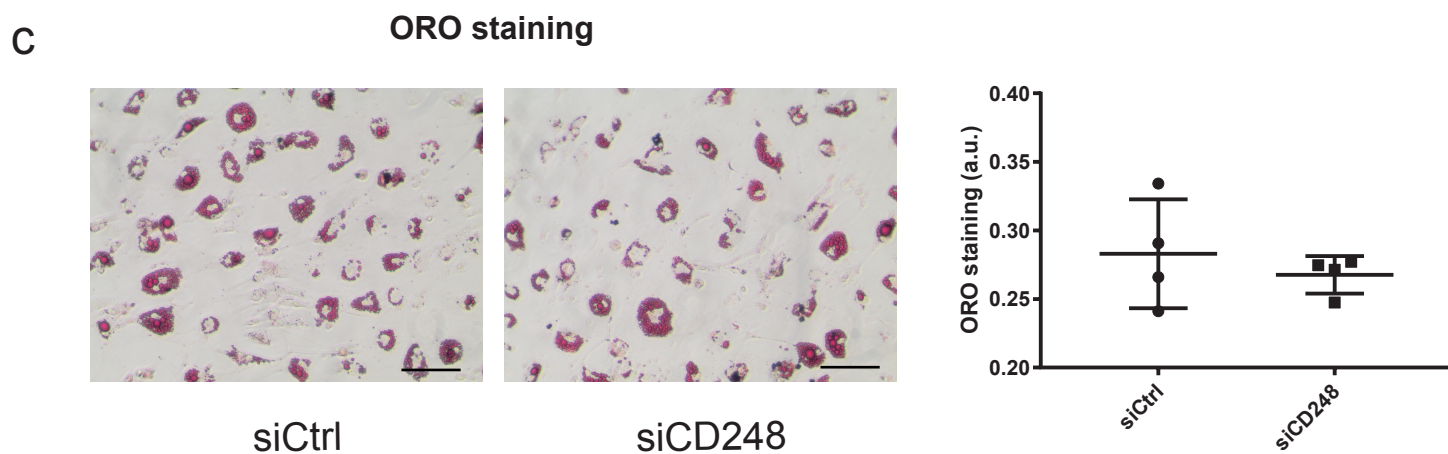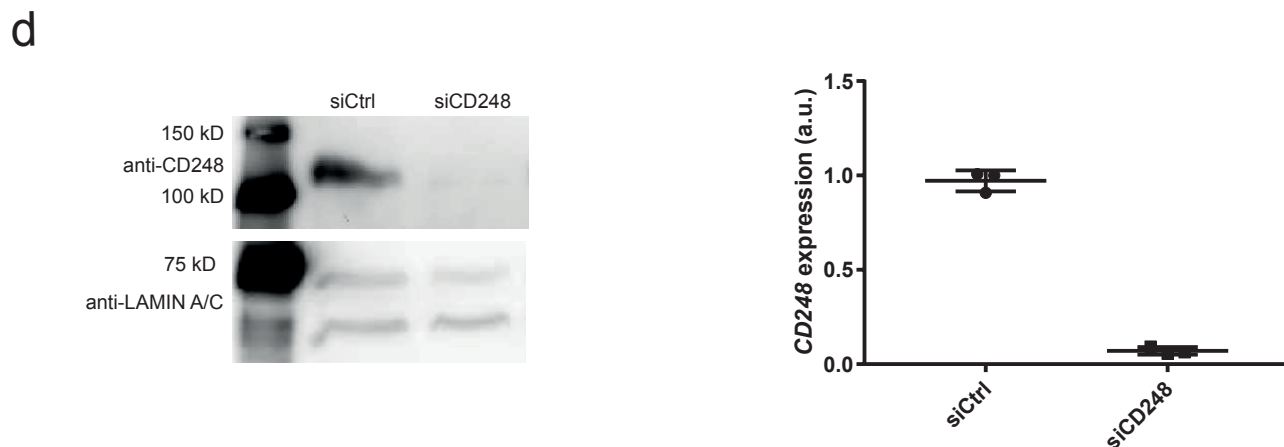

**Figure S1**

Supplement: mmc1.pdf [file mmc1.pdf]

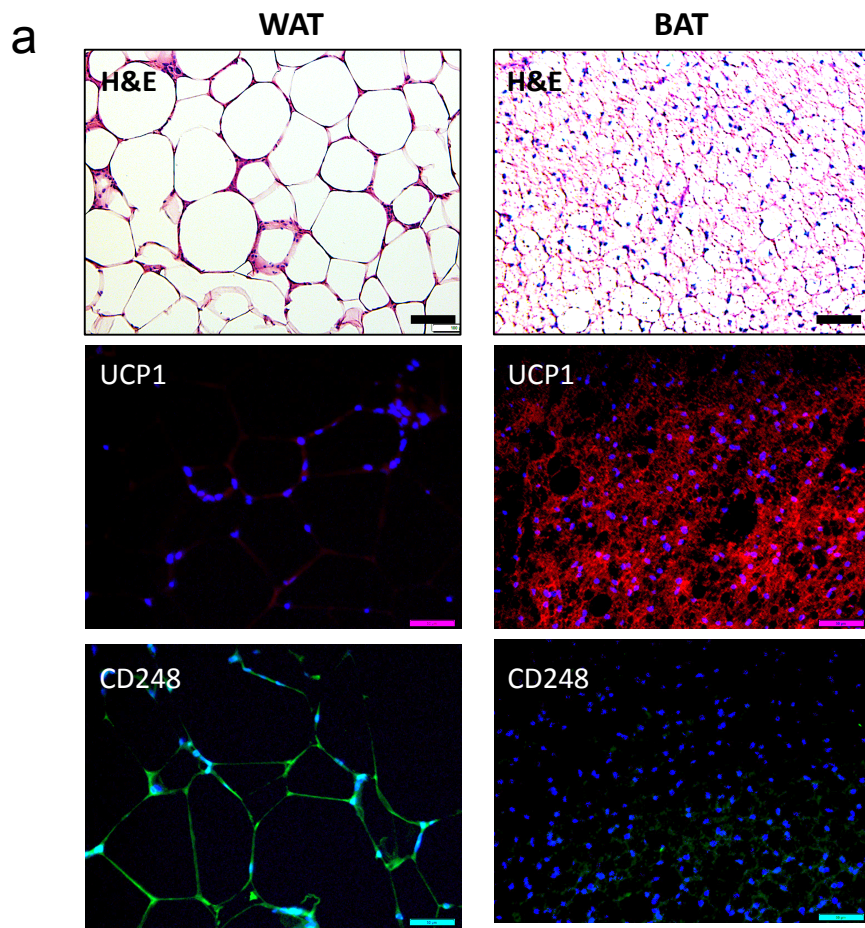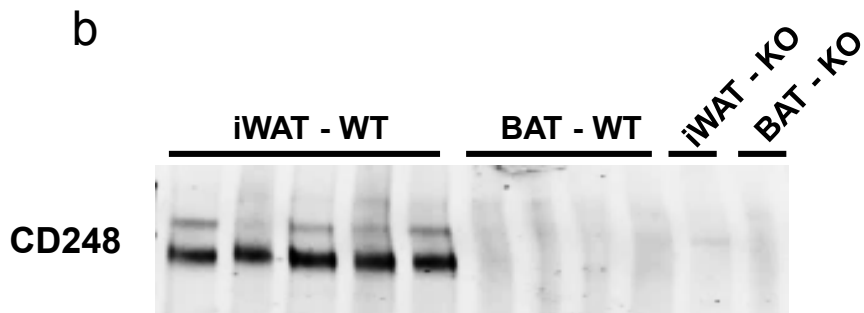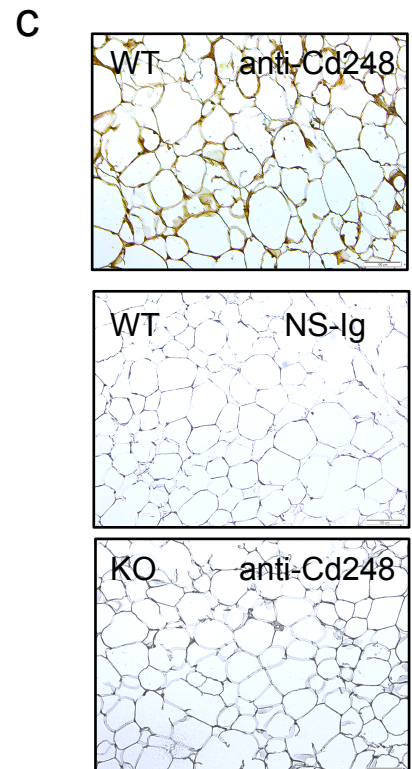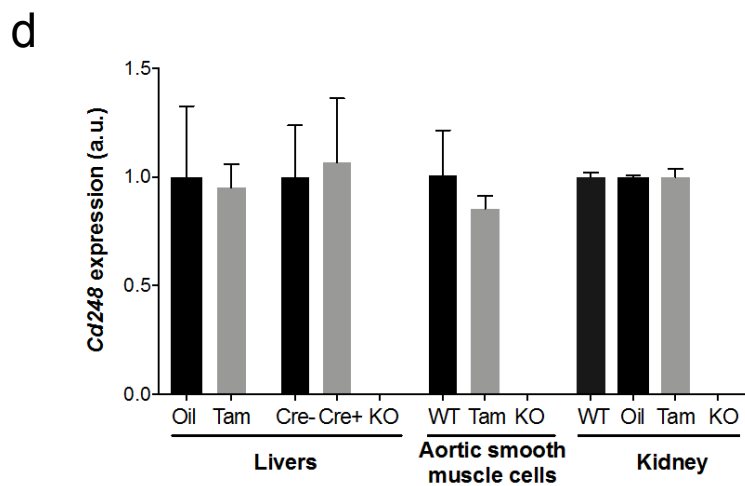

**Figure S2**

Supplement: mmc2.pdf [file mmc2.pdf]

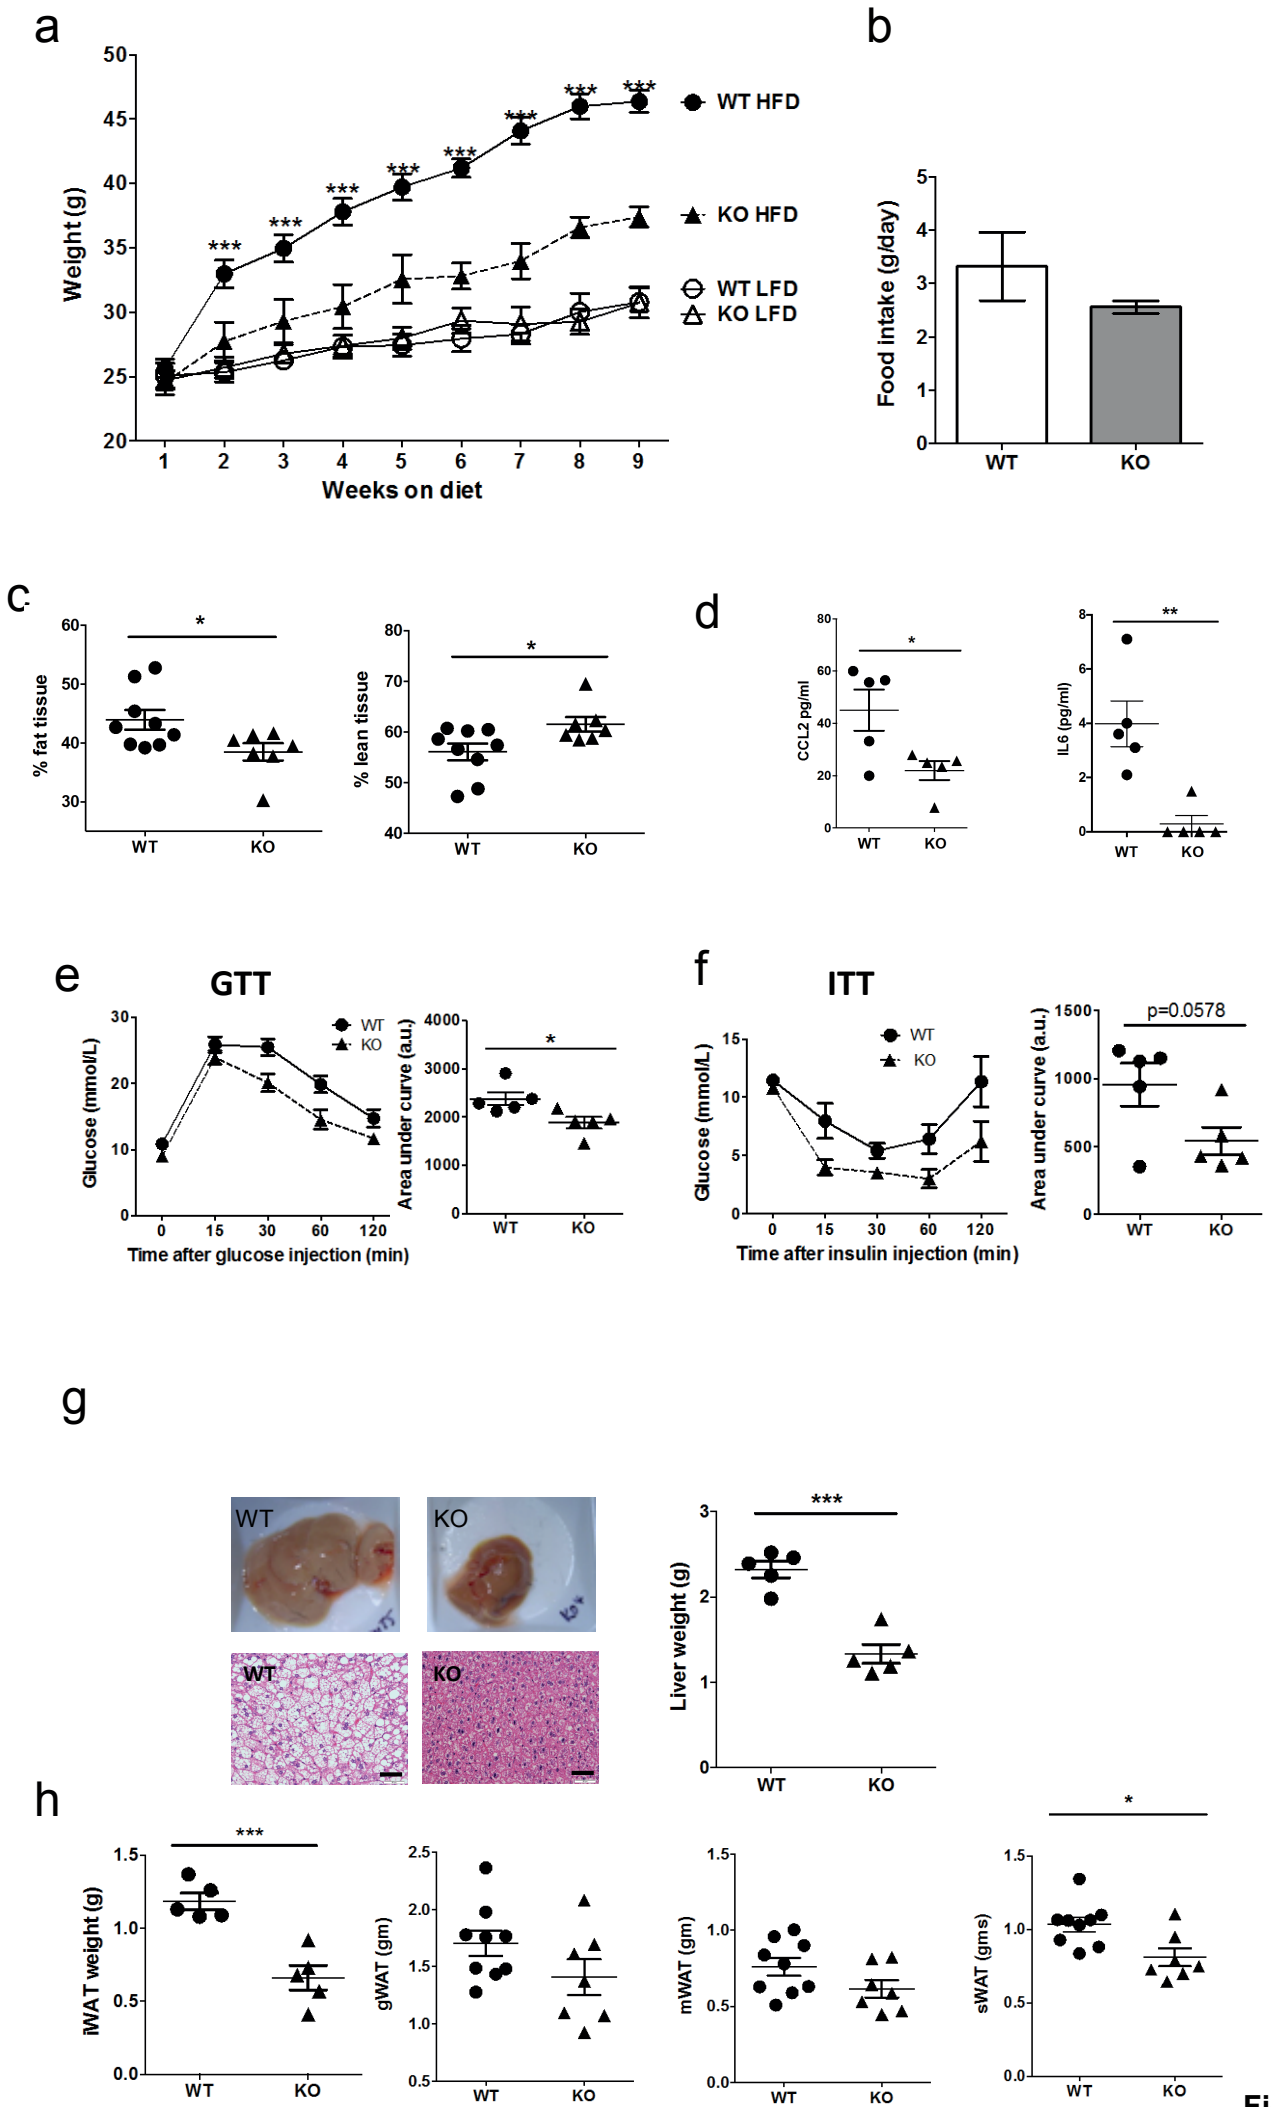

Supplement: mmc3.pdf [file mmc3.pdf]

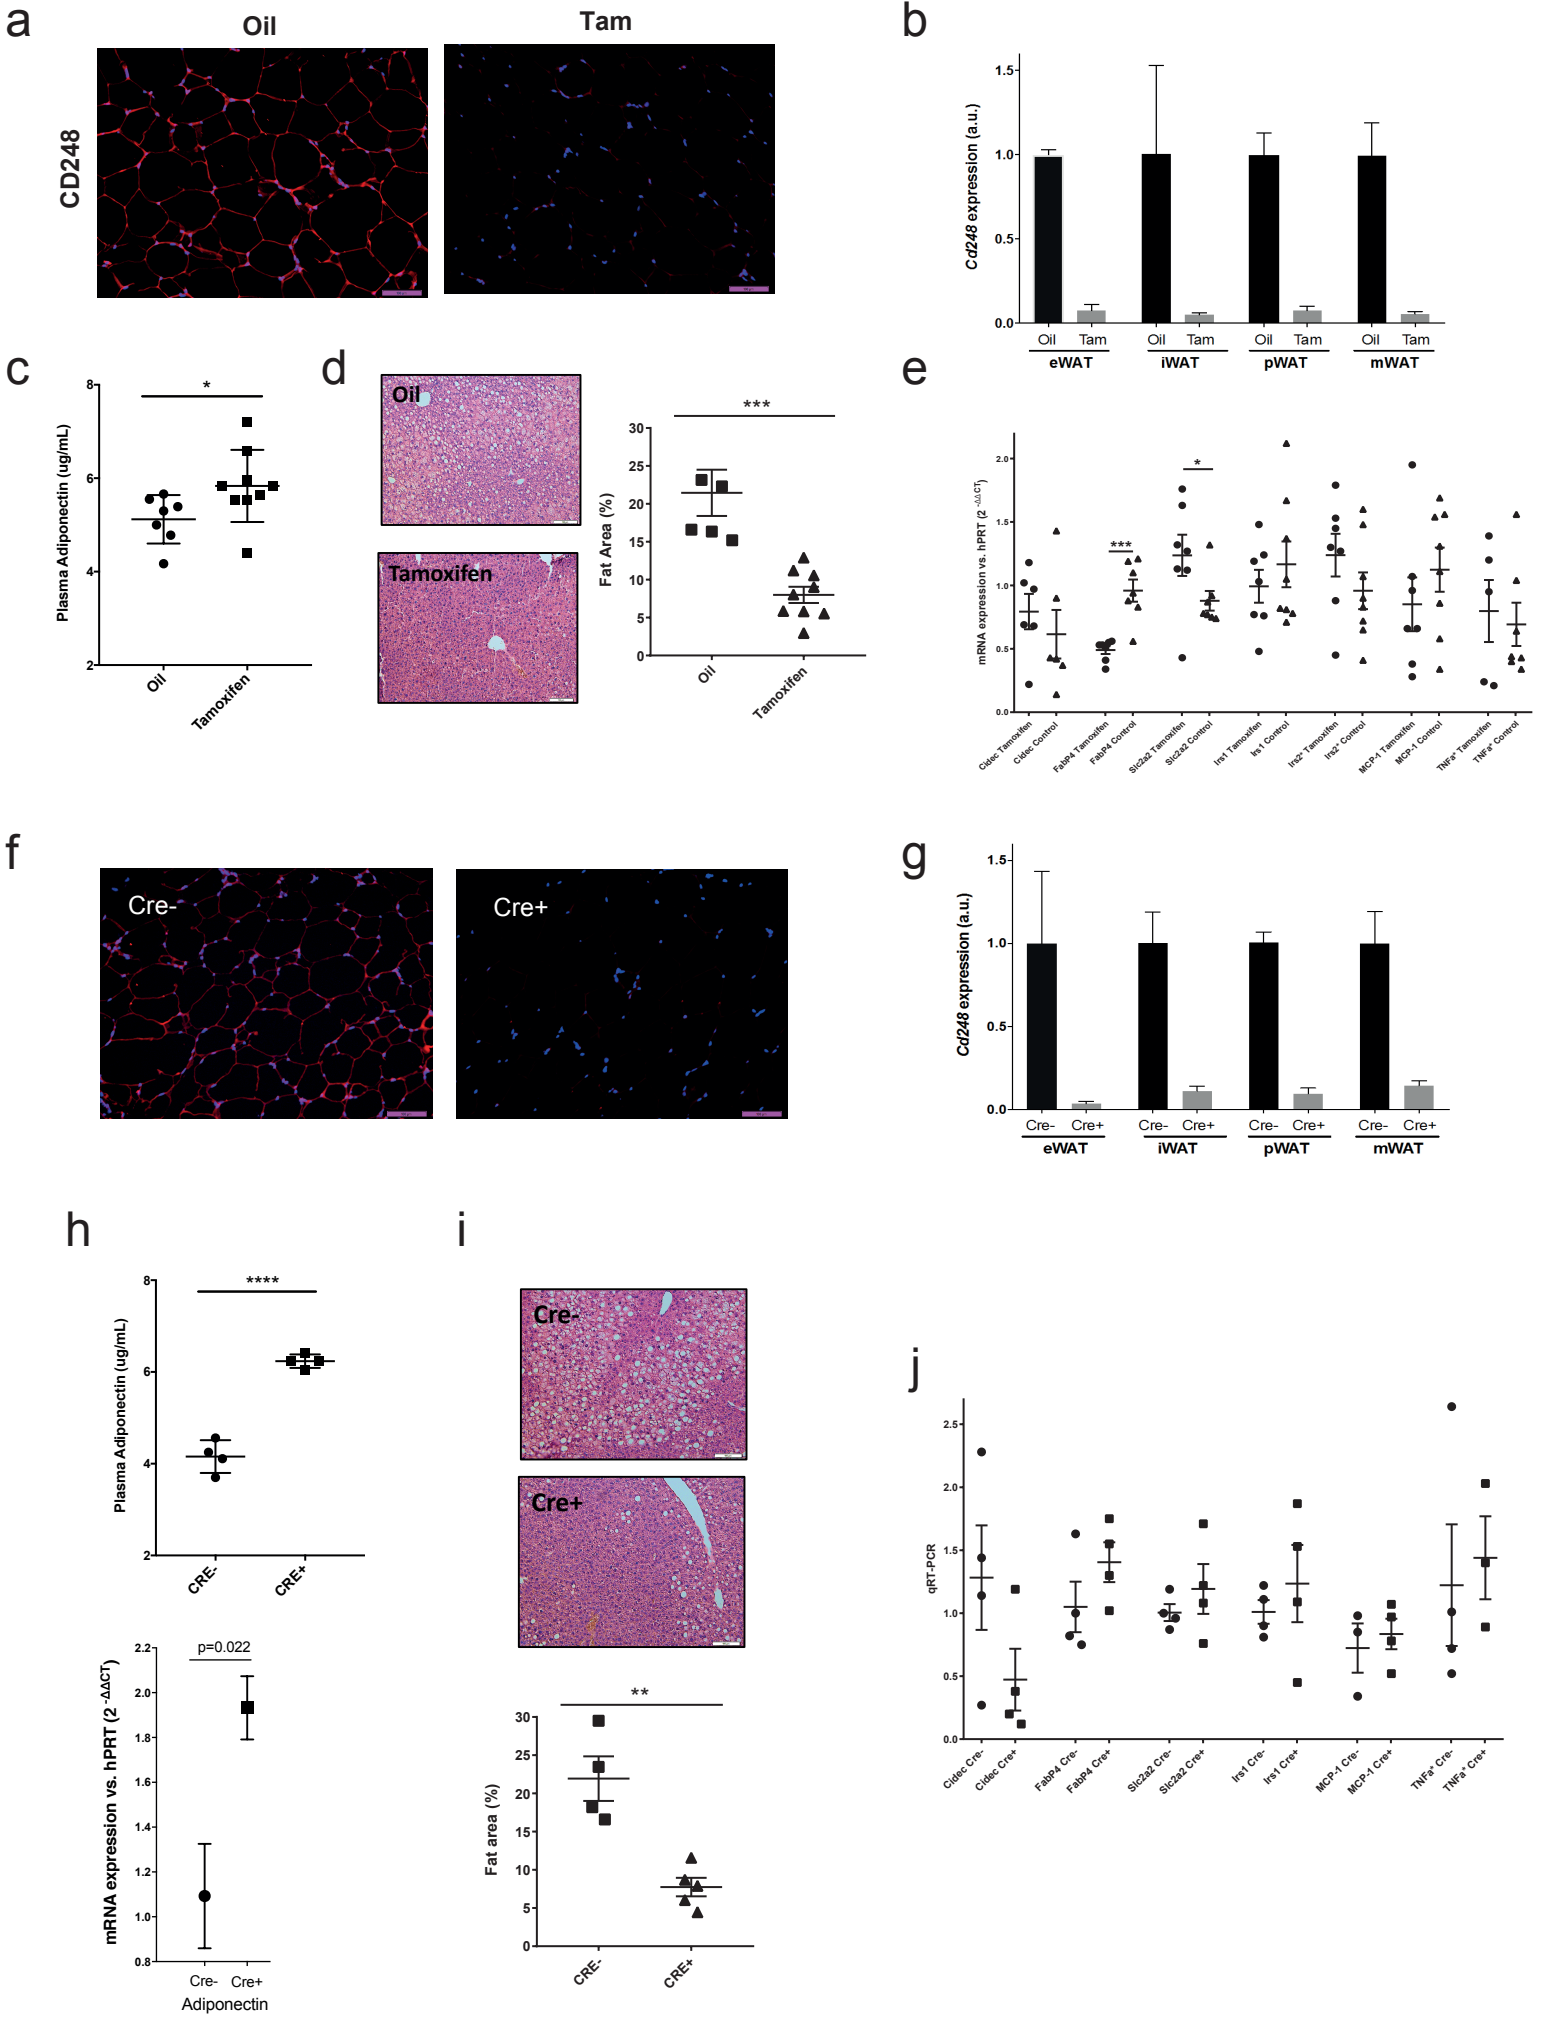

**Figure S4**

Supplement: mmc4.pdf [file mmc4.pdf]
